# Supplementary material
Source: PubMed Central journal article supplement (PMC3427728)

# Supplementary Figure S1

## A

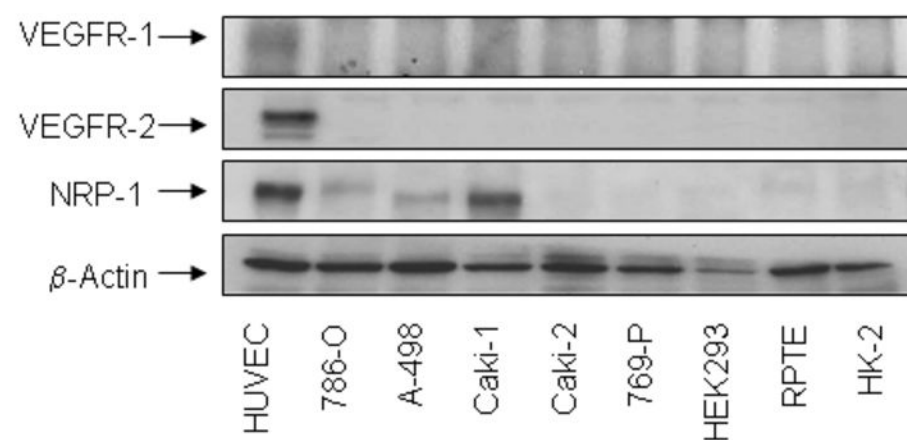

## B

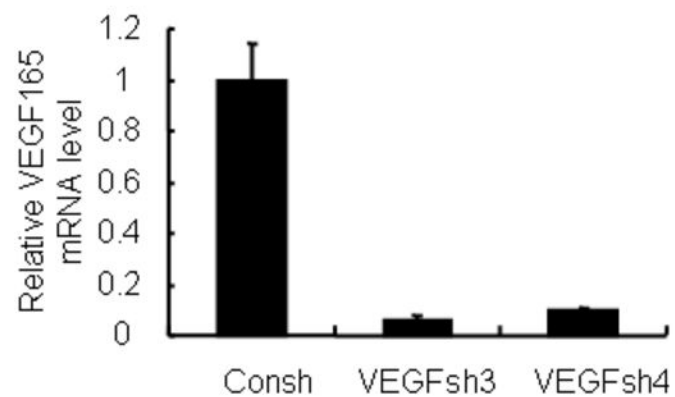

## C

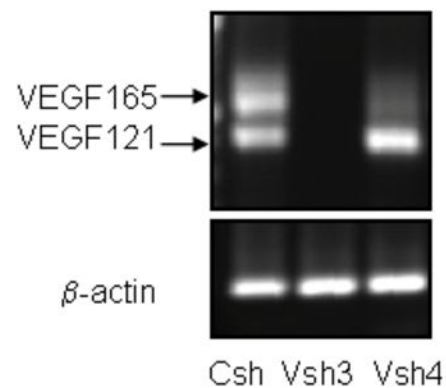

## D

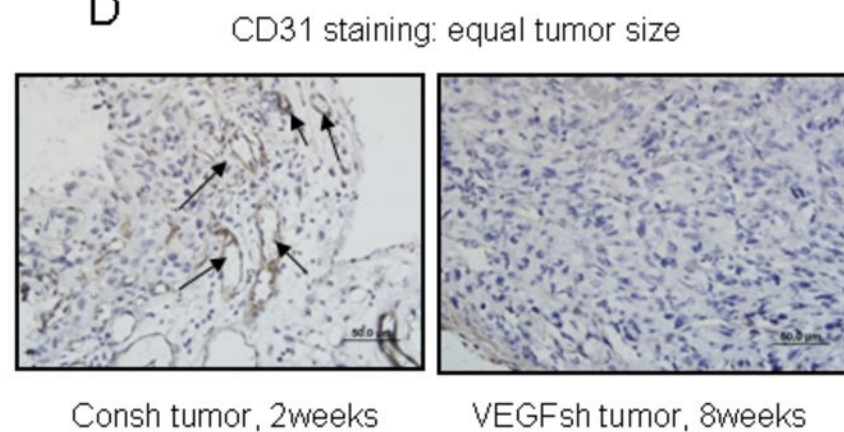

## E

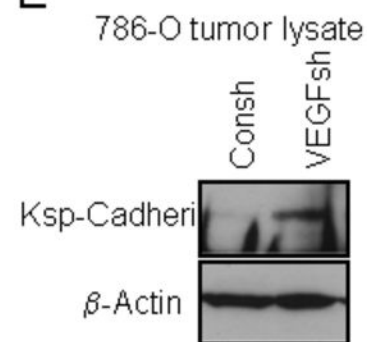

## Supplementary Figure S2

**A** 786-O cell

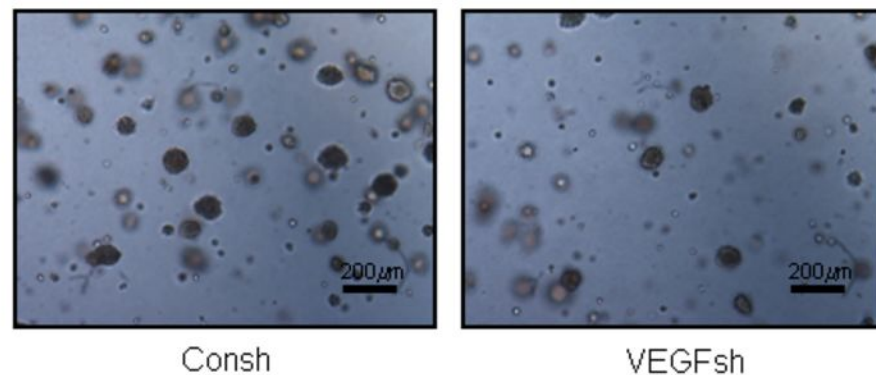

**B** A-498 cell

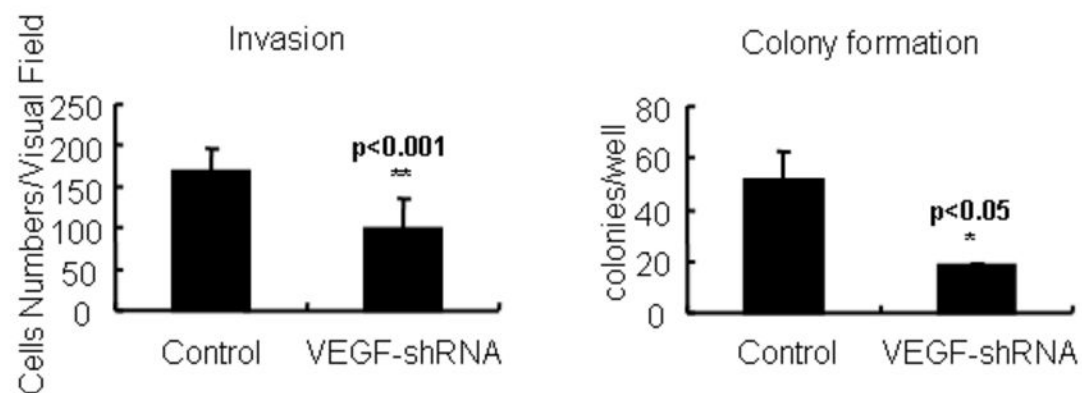

# Supplementary Figure S3

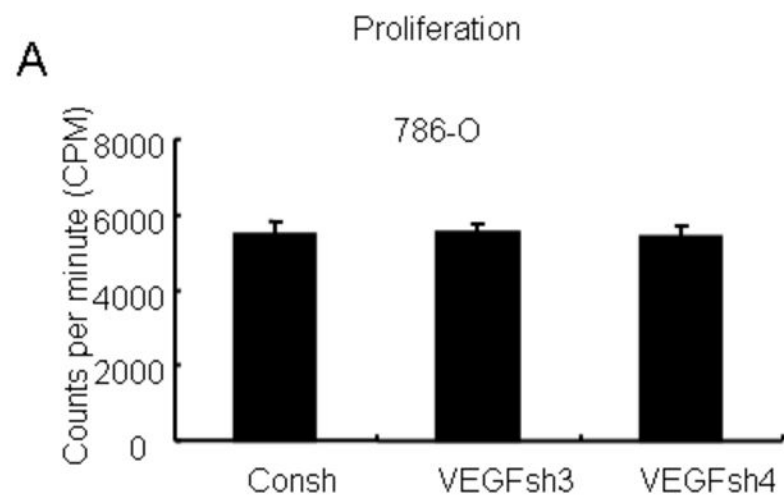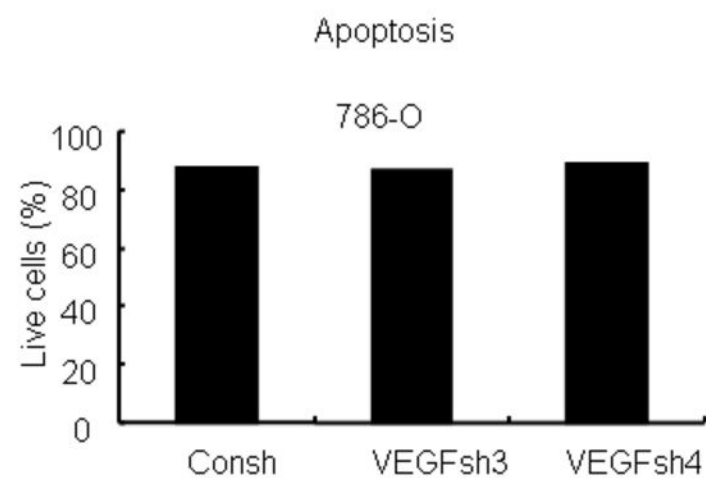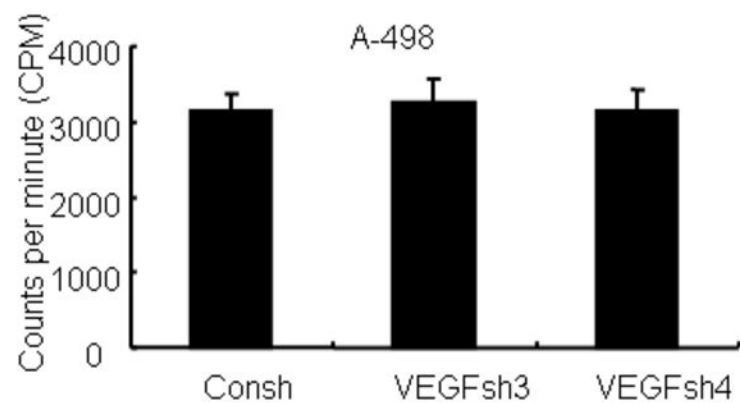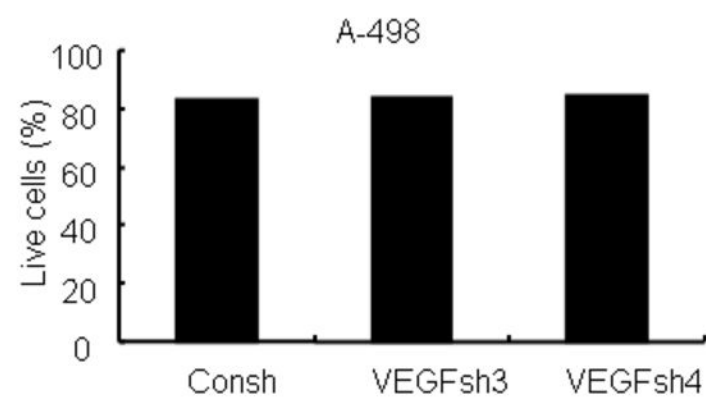

## Supplementary Figure S4

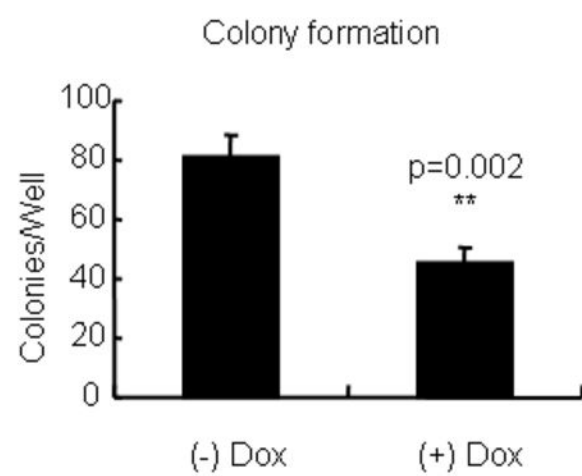

# Supplementary Figure S5

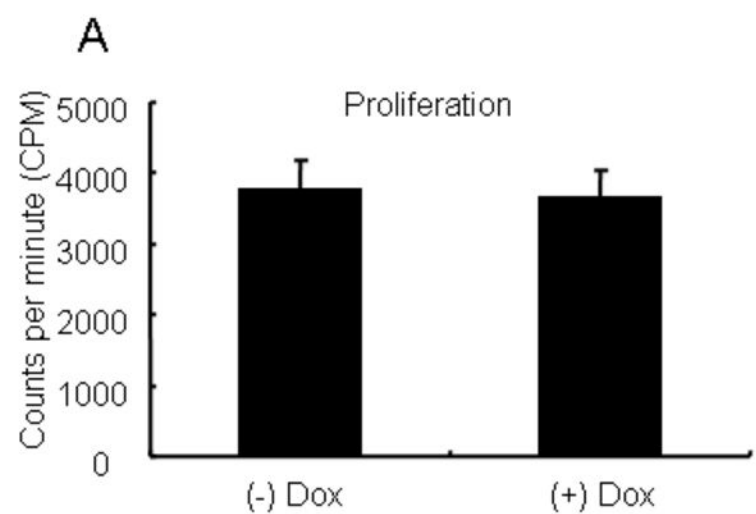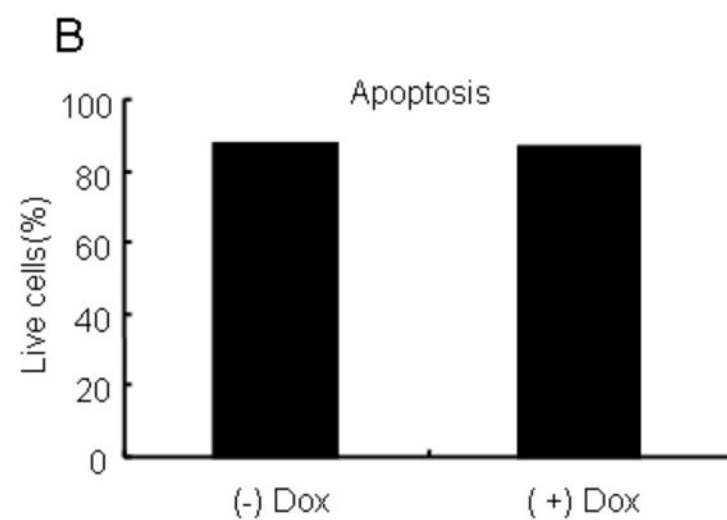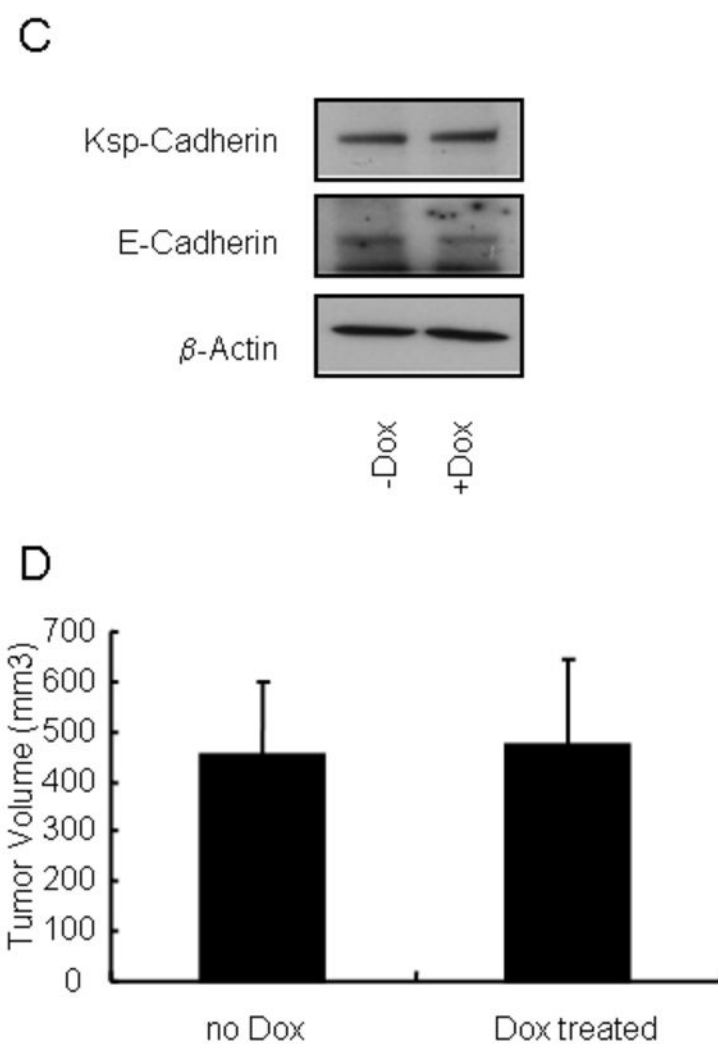

# Supplementary Figure S6

A

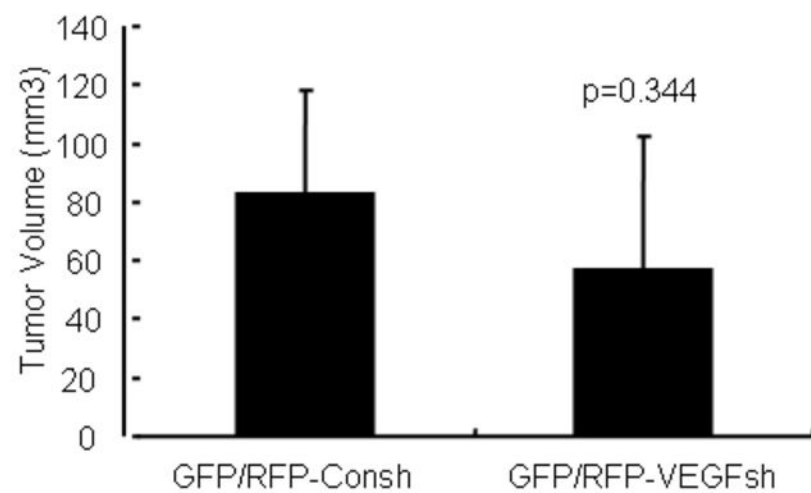

B

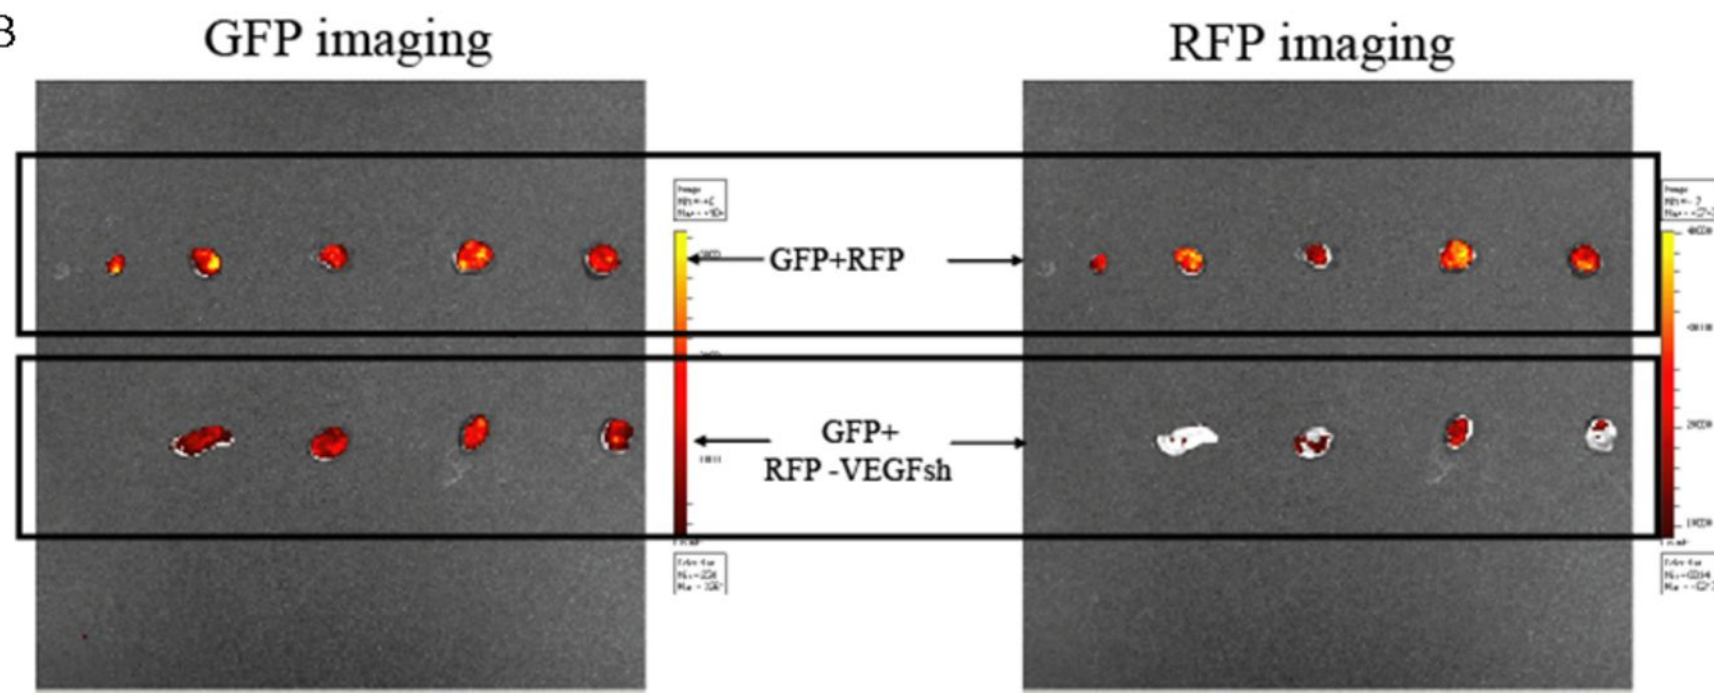

## Supplementary Figure S7

A

GFP/RFP cell distribution in the tumor

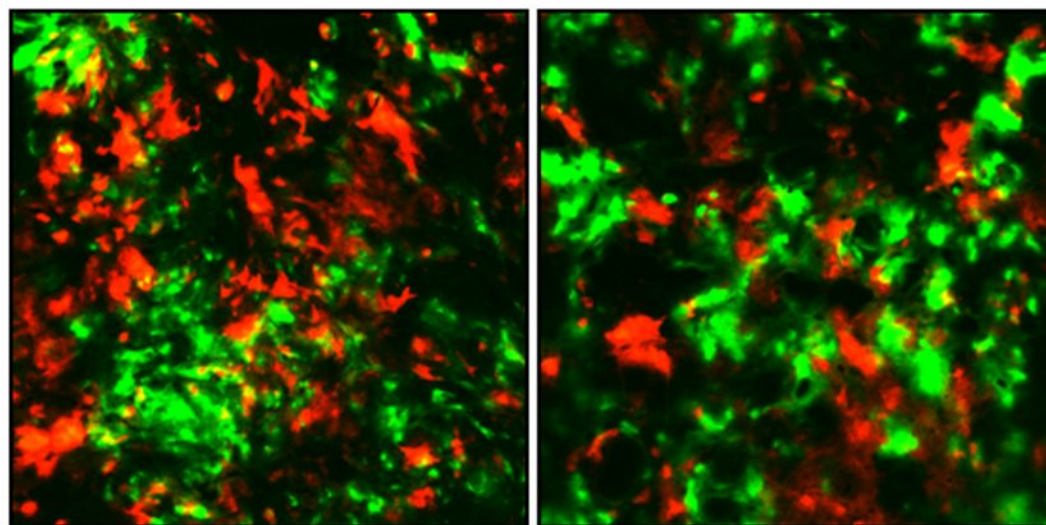

GFP/RFP-Consh

GFP/RFP-VEGFsh

B

CD31 staining

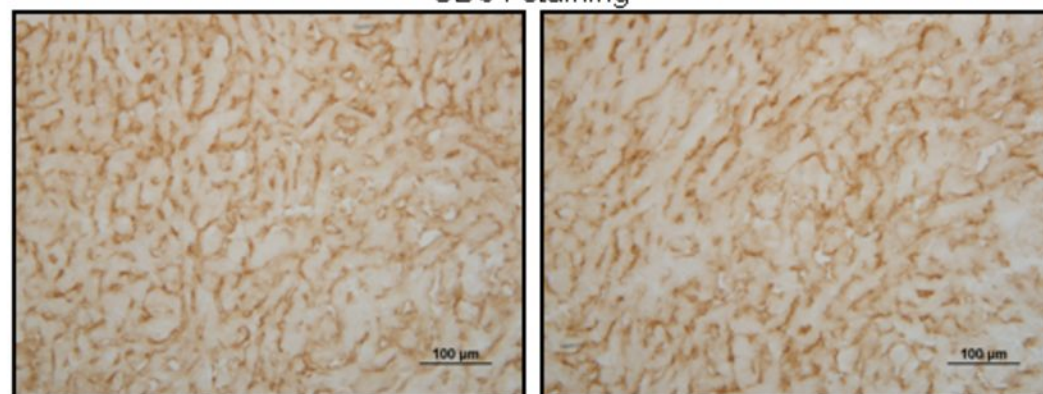

GFP/RFP-Consh

GFP/RFP-VEGFsh

# Supplementary Figure S8

**A**

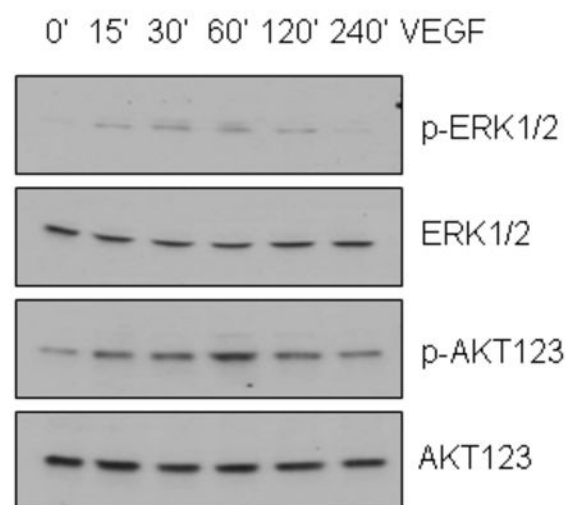

**B**

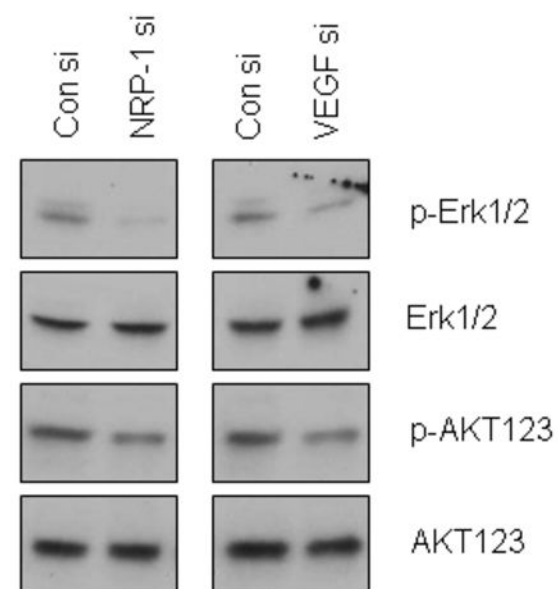

**C**

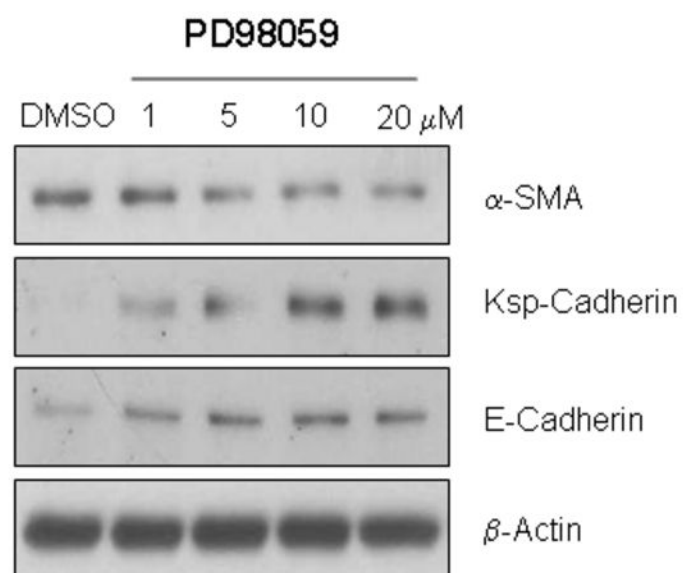



## Supplementary Figure S9

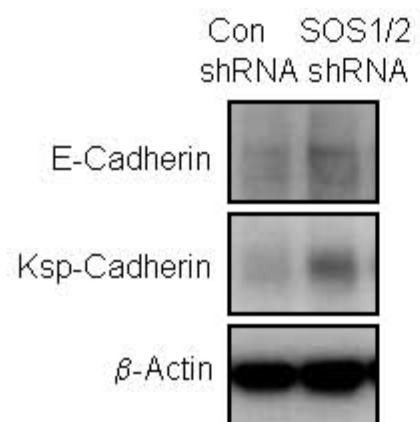

Supplement: NIHMS393833-supplement-3.pdf [file NIHMS393833-supplement-3.pdf]
